# Supplementary material for: Effects and Potential Mechanisms of Pioglitazone on Lipid Metabolism in Obese Diabetic KKAy Mice
Source: Hindawi journal article supplement (doi:10.1155/2014/538183), 2014-01-01
Supplement: f1 [file 538183.f1.zip]

## Supporting information

**Figure S1. Effects of pioglitazone on the levels of protein FASN, Acox1 and ACC in the liver of KKAY mice.**

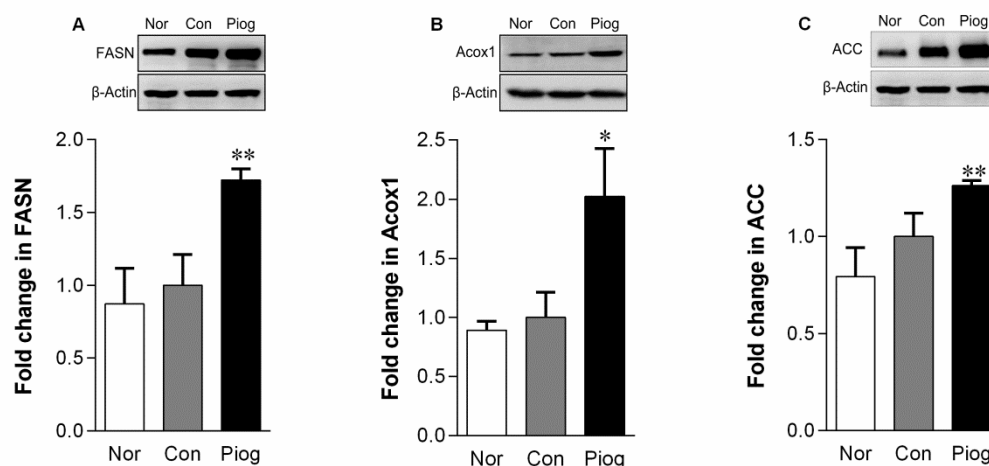

**Figure S1. Effects of pioglitazone on the levels of protein FASN, Acox1 and ACC in the liver of KKAY mice.** Representative Western blot for FASN (A), Acox1 (B), ACC (C) and β-actin. The bar graph represents statistical data from six individual mice per group. The bands were determined by densitometric analysis and expressed as fold change, after correction for β-actin levels, relative to the control mice. Nor, C57BL/6J mice; Con, vehicle-treated KKAY mice; Piog, pioglitazone-treated KKAY mice. Data are presented as mean ± S.E.M. \*P<0.05, \*\*P<0.01 vs. Con.

**Table S1. Sequences of primers for real-time PCR.**

| Gene      | 5'-Sense primer-3'   | 5'-Antisense primer-3' | Gene Bank<br>Accession.Version |
|-----------|----------------------|------------------------|--------------------------------|
| FABP4/ap2 | TCACCATCCGGTCAGAGAGT | TTCATCGAATTCCACGCCCA   | NM_024406.2                    |
| LPL       | CGTAGTTCCAGCAGCAAAGC | GAAGGCGGTCAAACCTCTGGA  | NM_008509.2                    |
| FAT/CD36  | CTCCTAGTAGGCGTGGGTCT | CACGGGGTCTCAACCATTC    | NM_001159558.1                 |
| FSP27     | ATGGTGCCAGAGTGGTTAGC | AGAGTCCCAGGTGAGAGACC   | NM_178373.3                    |
| AdipoQ    | CCCAGTCATGCCGAAGATGA | CACAAGTCCCTTGGGTGGA    | NM_009605.4                    |
| ACC       | GCTAAACCAGCACTCCCGAT | GTATCTGAGCTGACGGAGGC   | NM_133360.2                    |
| FASN      | CTTCTGGTGTGCAACTGTGC | AGGGCAGCTACCATGTTGTC   | NM_007988.3                    |
| SCD1      | GCGCTCTTACCCCTTGCTG  | GACTCTCGGGATGGGTGTC    | NM_009127.4                    |
| DGAT-2    | ACTGGAACACGCCCAAGAAA | GTAGTCTCGGAAGTAGCGCC   | NM_026384.3                    |
| FATP-1    | CGCCGATGTGCTCTATGACT | ACACAGTCATCCCAGAAGCG   | NM_011977.3                    |
| CPT-1a    | GACCGCGCTCTTAGGACTAC | GAGCAGCAAGGAAGGACACT   | NM_013495.2                    |
| ACOX-1    | GGAGACAGGTTGTCATCGCT | TTCATGACGGAGACCAGTGC   | NM_015729.3                    |
| mCAD      | TCAAGATCGCAATGGGTGCT | GCTCCACTAGCAGCTTTCCA   | NM_007382.4                    |

|                |                               |                             |                |
|----------------|-------------------------------|-----------------------------|----------------|
| ApoB           | <i>GTCCAGGTTGAATCACGGGT</i>   | <i>AGGATCCTGCAAGGTCAAGC</i> | NM_009693.2    |
| ApoC2          | <i>GTCTCGGTTCTTCTGGCTC</i>    | <i>TCCTTGGCAGAGGTCCAGTA</i> | NM_009695.3    |
| ApoC3          | <i>GCTAAGTAGCGTGCAGGAGT</i>   | <i>GCTCCAGTAGCCTTTCAGGG</i> | NM_023114.3    |
| MTTP           | <i>GTTTTTCCCGGTCAAGCGTT</i>   | <i>TCTTTCAGTGGGGCGATCTT</i> | NM_001163457.1 |
| HL             | <i>GTCGCTGCTGGGAACAAAAG</i>   | <i>GGATCAACTCGCCGATGTCT</i> | NM_008280.2    |
| ATGL           | <i>TGTGCAAAACAGGGCTACAGAG</i> | <i>AAAGGGTTGGGTTGGTTCAG</i> | NM_001163689.1 |
| HSL            | <i>GTGAATGAGATGGCGAGGGT</i>   | <i>GGAGTCGCGTTAGAGTCACC</i> | NM_010719.5    |
| SREBP-1        | <i>ACTTTTCCTTAACGTGGGCCT</i>  | <i>CATCTCGGCCAGTGTCTGTT</i> | NM_011480.3    |
| SREBP-2        | <i>CATAGCACTGTCCCCGACTC</i>   | <i>CTCCTTGGCTGCTGACTTGA</i> | NM_033218.1    |
| PPAR $\gamma$  | <i>GTCACACTCTGACAGGAGCC</i>   | <i>AGAACGTGACTTCTCAGCCC</i> | NM_001127330.1 |
| PPAR $\alpha$  | <i>CCGAACATTGGTGTTTCGAG</i>   | <i>GATACGCCCAAATGCACCAC</i> | NM_011144.6    |
| PPAR $\beta$   | <i>ATGGGACTCACTCAGAGGCT</i>   | <i>TGGCTGTTCCATGACTGACC</i> | NM_011145.3    |
| LXR $\alpha$   | <i>AGAGTCTTGGGTCGCCAGTA</i>   | <i>CTGGAGCCCTGGACATTACC</i> | NM_013839.4    |
| LXR $\beta$    | <i>GCTAGCCATCATCTCGGTCC</i>   | <i>TCTCAATGGTGGACGCCTTC</i> | NM_009473.2    |
| FXR            | <i>GGCTGCAAAGGTTTCTTCGG</i>   | <i>ACATTAGCCAACATCCCCA</i>  | NM_001163700.1 |
| HMGR           | <i>TGCCTGGATGGGAAGGAGTA</i>   | <i>GCCTCGAGTCATCCCATCTG</i> | NM_008255.2    |
| ApoA1          | <i>GAACGAGTACCACACAGGG</i>    | <i>ATGGGCATCAGACTATGGCG</i> | NM_009692.3    |
| ApoE           | <i>CCTGAACCGCTTCTGGGATT</i>   | <i>CCATCAGTGCCGTCAGTTCT</i> | NM_009696.3    |
| SR-BI          | <i>GTGCCCATCATCTGCCAACT</i>   | <i>TAGGCCTGAATGGCCTCCTT</i> | NM_016741.2    |
| LDLR           | <i>GGGAACATTTGCGGGTCTGT</i>   | <i>AGTCTTCTGCTGCAACTCCG</i> | NM_010700.3    |
| ABCA1          | <i>GCCTGGATCTACTCTGTGCG</i>   | <i>GCCATTGTCCAGACCCATGA</i> | NM_013454.3    |
| ABCG5          | <i>CTATCAGCTTGTGGGTGCCA</i>   | <i>GAGGACGTGTAGCACGTAGG</i> | NM_031884.1    |
| ABCG8          | <i>AAGACCCTTGGGCGTTACAG</i>   | <i>CCACTGTGAAAGCCGATCCT</i> | NM_026180.2    |
| ABCB11         | <i>TCATCGCCGTCATGTCACAA</i>   | <i>TAGTAGGCCCCCTTCTGGTC</i> | NM_021022.3    |
| ABCB4          | <i>GAGCAAAGTCCAGGTCTGCG</i>   | <i>TTGGTTGCTGATGCTGCCTA</i> | NM_008830.2    |
| Cyp7a1         | <i>GGGAGGCTTGGGAATTTTG</i>    | <i>AACGCTCAGCAGTCGTTACA</i> | NM_007824.2    |
| Cyp27a1        | <i>CGGGCAGAGAGTGAATCAGG</i>   | <i>AGATCTGATGAAGGCGGCAG</i> | NM_024264.4    |
| NPC1-L1        | <i>GTGGAGTTCGTGTCCACAT</i>    | <i>TGAGCAAAGCCCAGGATGAG</i> | NM_207242.2    |
| ACAT-2         | <i>TTACCTCAGTCGCAGACAGG</i>   | <i>TGAGCCCGCATTCATCTTGT</i> | NM_009338.3    |
| $\beta$ -ACTIN | <i>ACTCTTCCAGCCTTCTTTC</i>    | <i>ATCTCCTTCTGCATCCTGTC</i> |                |

**Table S1. Sequences of primers for real-time PCR.** FABP4/ap2, adipocyte fatty acid binding protein 4; LPL, lipoprotein lipase; FAT/CD36, fatty acid translocase/ CD36 antigen; FSP27, fat specific protein 27; AdipoQ, adiponectin; ACC, acetyl-coenzyme A carboxylase; FASN, fatty acid synthase; SCD1, steroyl-coenzyme A desaturase 1; DGAT-2, diacylglycerol O-acyltransferase 2; FATP-1, long-chain fatty acid transport protein 1; CPT-1a, carnitine-palmitoyl transferase 1a; ACOX-1, acyl-Coenzyme A oxidase 1; mCAD, middle-chain acyl-CoA dehydrogenase; ApoB, apolipoprotein B; ApoC2, apolipoprotein C-II; ApoC3, apolipoprotein C-III; MTTP, microsomal triglyceride transfer protein; HL, hepatic lipase; ATGL, adipose triglyceride lipase; HSL, hormone sensitive lipase; SREBP-1, sterol regulatory element binding transcription factor 1; SREBP-2, sterol regulatory element binding transcription factor 2; PPAR $\gamma$ , peroxisome proliferator activated receptor gamma; PPAR $\alpha$ , peroxisome proliferator activated receptor alpha; PPAR $\beta/\delta$ , peroxisome

proliferator activated receptor delta; LXR $\alpha$ , liver X receptor alpha; LXR $\beta$ , liver X receptor beta; FXR, farnesoid X receptor; HMGCR, 3-hydroxy-3-methylglutaryl-Coenzyme A reductase; ApoA1, apolipoprotein A-I; ApoE, apolipoprotein E; SR-BI, scavenger receptor class B, member 1; LDLR, low density lipoprotein receptor; ABCA1, ATP-binding cassette, sub-family A , member 1; ABCG5, ATP-binding cassette, sub-family G, member 5; ABCG8, ATP-binding cassette, sub-family G , member 8; ABCB11, ATP-binding cassette, sub-family B (MDR/TAP), member 11; ABCB4, ATP-binding cassette, sub-family B (MDR/TAP), member 4; Cyp7a1, cytochrome P450, family 7, subfamily a, polypeptide 1; Cyp27a1, cytochrome P450, family 27, subfamily a, polypeptide 1; NPC1-L1, Niemann–Pick C1 Like 1; ACAT-2, acetyl-Coenzyme A acetyltransferase 2.
