# Supplementary material for: Effects and Potential Mechanisms of Pioglitazone on Lipid Metabolism in Obese Diabetic KKAy Mice
Source: Hindawi journal article supplement (doi:10.1155/2014/538183), 2014-01-01
Supplement: f1 [file 538183.f1.zip]

## Supporting information

**Table S1. Sequences of primers for real-time PCR.**

| Gene          | 5'-Sense primer-3'           | 5'-Antisense primer-3'      | Gene Bank<br>Accession.Version |
|---------------|------------------------------|-----------------------------|--------------------------------|
| FABP4/ap2     | <i>TCACCATCCGGTCAGAGAGT</i>  | <i>TTCATCGAATTCCACGCCCA</i> | NM_024406.2                    |
| LPL           | <i>CGTAGTTCAGCAGCAAAGC</i>   | <i>GAAGGCGGTCAAACCTGGA</i>  | NM_008509.2                    |
| FAT/CD36      | <i>CTCCTAGTAGGCGTGGGTCT</i>  | <i>CACGGGGTCTCAACCATTCA</i> | NM_001159558.1                 |
| FSP27         | <i>ATGGTGCCAGAGTGGTTAGC</i>  | <i>AGAGTCCCAGGTGAGAGACC</i> | NM_178373.3                    |
| AdipoQ        | <i>CCCAGTCATGCCGAAGATGA</i>  | <i>CACAAGTTCCCTTGGGTGGA</i> | NM_009605.4                    |
| ACC           | <i>GCTAAACCAGCACTCCCGAT</i>  | <i>GTATCTGAGCTGACGGAGGC</i> | NM_133360.2                    |
| FASN          | <i>CTTCTGGTGTGCAACTGTGC</i>  | <i>AGGGCAGCTACCATGTTGTC</i> | NM_007988.3                    |
| SCD1          | <i>GCGCTCTTTACCCCTTGCTG</i>  | <i>GACTCTCGGGATGGGTGTTT</i> | NM_009127.4                    |
| DGAT-2        | <i>ACTGGAACACGCCCAAGAAA</i>  | <i>GTAGTCTCGGAAGTAGCGCC</i> | NM_026384.3                    |
| FATP-1        | <i>CGCCGATGTGCTCTATGACT</i>  | <i>ACACAGTCATCCCAGAAGCG</i> | NM_011977.3                    |
| CPT-1a        | <i>GACCGCGCTCTTAGGACTAC</i>  | <i>GAGCAGCAAGGAAGGACACT</i> | NM_013495.2                    |
| ACOX-1        | <i>GGAGACAGGTTGTCATCGCT</i>  | <i>TTCATGACGGAGACCAGTGC</i> | NM_015729.3                    |
| mCAD          | <i>TCAAGATCGCAATGGGTGCT</i>  | <i>GCTCCACTAGCAGCTTTCCA</i> | NM_007382.4                    |
| ApoB          | <i>GTCCAGGTTGAATCACGGGT</i>  | <i>AGGATCCTGCAAGGTCAAGC</i> | NM_009693.2                    |
| ApoC2         | <i>GTCTCGGTTCTTCTGGCTC</i>   | <i>TCCTTGGCAGAGGTCCAGTA</i> | NM_009695.3                    |
| ApoC3         | <i>GCTAAGTAGCGTGCAAGAGT</i>  | <i>GCTCCAGTAGCCTTTCAGGG</i> | NM_023114.3                    |
| MTTP          | <i>GTTTTTCCCGGTCAAGCGTT</i>  | <i>TCTTTCAGTGGGGCGATCTT</i> | NM_001163457.1                 |
| HL            | <i>GTCGCTGCTGGGAACAAAAG</i>  | <i>GGATCAACTCGCCGATGTCT</i> | NM_008280.2                    |
| ATGL          | <i>TGTGCAAACAGGGCTACAGAG</i> | <i>AAAGGGTTGGGTGGTTCAG</i>  | NM_001163689.1                 |
| HSL           | <i>GTGAATGAGATGGCGAGGGT</i>  | <i>GGAGTCGCGTTAGAGTCACC</i> | NM_010719.5                    |
| SREBP-1       | <i>ACTTTTCCTTAACGTGGGCCT</i> | <i>CATCTCGGCCAGTGTCTGTT</i> | NM_011480.3                    |
| SREBP-2       | <i>CATAGCACTGTCCCCGACTC</i>  | <i>CTCCTTGGCTGCTGACTTGA</i> | NM_033218.1                    |
| PPAR $\gamma$ | <i>GTCACACTCTGACAGGAGCC</i>  | <i>AGAACGTGACTTCTCAGCCC</i> | NM_001127330.1                 |
| PPAR $\alpha$ | <i>CCGAACATTGGTGTTCGCAG</i>  | <i>GATACGCCCAAATGCACCAC</i> | NM_011144.6                    |
| PPAR $\beta$  | <i>ATGGGACTCACTCAGAGGCT</i>  | <i>TGGCTGTTCCATGACTGACC</i> | NM_011145.3                    |
| LXR $\alpha$  | <i>AGAGTCTTGGGTCGCCAGTA</i>  | <i>CTGGAGCCCTGGACATTACC</i> | NM_013839.4                    |
| LXR $\beta$   | <i>GCTAGCCATCATCTCGGTCC</i>  | <i>TCTCAATGGTGGACGCCTTC</i> | NM_009473.2                    |
| FXR           | <i>GGCTGCAAAGGTTTCTTCCG</i>  | <i>ACATTAGCCAACATCCCCA</i>  | NM_001163700.1                 |
| HMGR          | <i>TGCCTGGATGGGAAGGAGTA</i>  | <i>GCCTCGAGTCATCCCATCTG</i> | NM_008255.2                    |
| ApoA1         | <i>GAACGAGTACCACACCAGGG</i>  | <i>ATGGGCATCAGACTATGGCG</i> | NM_009692.3                    |
| ApoE          | <i>CCTGAACCGCTTCTGGGATT</i>  | <i>CCATCAGTGCCGTCAGTTCT</i> | NM_009696.3                    |
| SR-BI         | <i>GTGCCCATCATCTGCCAACT</i>  | <i>TAGGCCTGAATGGCCTCCTT</i> | NM_016741.2                    |
| LDLR          | <i>GGGAACATTTCGGGGTCTGT</i>  | <i>AGTCTTCTGCTGCAACTCCG</i> | NM_010700.3                    |

|         |                              |                             |             |
|---------|------------------------------|-----------------------------|-------------|
| ABCA1   | <i>GCCTGGATCTACTCTGTGCGC</i> | <i>GCCATTGTCCAGACCCATGA</i> | NM_013454.3 |
| ABCG5   | <i>CTATCAGCTTGTGGGTGCCA</i>  | <i>GAGGACGTGTAGCACGTAGG</i> | NM_031884.1 |
| ABCG8   | <i>AAGACCCTTGGGCGTTACAG</i>  | <i>CCACTGTGAAAGCCGATCCT</i> | NM_026180.2 |
| ABCB11  | <i>TCATCGCCGTCATGTCACAA</i>  | <i>TAGTAGGCCCCCTTCTGGTC</i> | NM_021022.3 |
| ABCB4   | <i>GAGCAAAGTCCAGGTCTGCG</i>  | <i>TTGGTTGCTGATGCTGCCTA</i> | NM_008830.2 |
| Cyp7a1  | <i>GGGCAGGCTTGGGAATTTTG</i>  | <i>AACGCTCAGCAGTCGTTACA</i> | NM_007824.2 |
| Cyp27a1 | <i>CGGGCAGAGAGTGAATCAGG</i>  | <i>AGATCTGATGAAGGCGGCAG</i> | NM_024264.4 |
| NPC1-L1 | <i>GTGGAGTTCGTGTCCCACAT</i>  | <i>TGAGCAAAGCCCAGGATGAG</i> | NM_207242.2 |
| ACAT-2  | <i>TTACCTCAGTCGCAGACAGG</i>  | <i>TGAGCCCGCATTCATCTTGT</i> | NM_009338.3 |
| β-ACTIN | <i>ACTCTTCCAGCCTTCCTTC</i>   | <i>ATCTCCTTCTGCATCCTGTC</i> |             |

**Table S1. Sequences of primers for real-time PCR.** FABP4/ap2, adipocyte fatty acid binding protein 4; LPL, lipoprotein lipase; FAT/CD36, fatty acid translocase/ CD36 antigen; FSP27, fat specific protein 27; AdipoQ, adiponectin; ACC, acetyl-coenzyme A carboxylase; FASN, fatty acid synthase; SCD1, steroyl-coenzyme A desatures 1; DGAT-2, diacylglycerol O-acyltransferase 2; FATP-1, long-chain fatty acid transport protein 1; CPT-1a, carnitine-palmitoyl transferase1a; ACOX-1, acyl-Coenzyme A oxidase 1; mCAD, middle-chain acyl-CoA dehydrogenase; ApoB, apolipoprotein B; ApoC2, apolipoprotein C-II; ApoC3, apolipoprotein C-III; MTTP, microsomal triglyceride transfer protein; HL, hepatic lipase; ATGL, adipose triglyceride lipase; HSL, hormone sensitive lipase; SREBP-1, sterol regulatory element binding transcription factor 1; SREBP-2, sterol regulatory element binding transcription factor 1; PPAR $\gamma$ , peroxisome proliferator activated receptor gamma; PPAR $\alpha$ , peroxisome proliferator activated receptor alpha; PPAR $\beta/\delta$ , peroxisome proliferator activated receptor delta; LXR $\alpha$ , liver X receptor alpha; LXR $\beta$ , liver X receptor beta; FXR, farnesoid X receptor; HMGCR, 3-hydroxy-3-methylglutaryl-Coenzyme A reductase; ApoA1, apolipoprotein A-I; ApoE, apolipoprotein E; SR-BI, scavenger receptor class B, member 1; LDLR, low density lipoprotein receptor; ABCA1, ATP-binding cassette, sub-family A , member 1; ABCG5, ATP-binding cassette, sub-family G, member 5; ABCG8, ATP-binding cassette, sub-family G , member 8; ABCB11, ATP-binding cassette, sub-family B (MDR/TAP), member 11; ABCB4, ATP-binding cassette, sub-family B (MDR/TAP), member 4; Cyp7a1, cytochrome P450, family 7, subfamily a, polypeptide 1; Cyp27a1, cytochrome P450, family 27, subfamily a, polypeptide 1; NPC1-L1, Niemann–Pick C1 Like 1; ACAT-2, acetyl-Coenzyme A acetyltransferase 2.
