# Supplementary material for: Effects and Potential Mechanisms of Pioglitazone on Lipid Metabolism in Obese Diabetic KKAy Mice
Source: PPAR Res. 2014 Mar 31;2014:538183. doi: 10.1155/2014/538183 (PMC3988943; doi:10.1155/2014/538183)
Supplement: Supplementary file 1 — Figure S1: Effects of pioglitazone on the levels of protein FASN, Acox1 and ACC in the liver of KKAy mice. Table S1: Sequences of primers for real-time PCR. [file 538183.f1.zip]

Archive with 2 entries (2 files):
- mat.538183.v1.pdf
- mat.538183.v2.pdf
